# Supplementary material for: The intervals method: a new approach to analyse finite element outputs using multivariate statistics
Source: PeerJ. 2017 Oct 13;5:e3793. doi: 10.7717/peerj.3793 (PMC5642245; doi:10.7717/peerj.3793)
Supplement: Supplemental Information 2 — Influence of the size of the mesh. [file peerj-05-3793-s002.xlsx]

## Sheet: N=3
			percent area
mesh		group	1	2	3
1			97.2789	2.5572	0.163871
2			97.4091	2.45977	0.131122
3			97.1808	1.79051	1.02864
4			97.4408	1.42262	1.13658
5			97.1574	1.86563	0.976972
6			97.0762	1.96204	0.961731
7			97.012	2.08731	0.900645
8			96.9642	2.10803	0.927776
9			96.9727	2.10129	0.925991
10			96.9452	2.11306	0.941789
11			96.9366	2.11795	0.945405
12			96.9293	2.12436	0.946384
			relative error
mesh	error	variance	1	2	3
1	0.521675	0.052757	0.349666	0.432847	0.782513
2	0.543508	0.0606031	0.479849	0.335413	0.815262
3	0.222561	0.0164554	0.251584	0.333842	0.0822581
4	0.467822	0.0668494	0.511533	0.701733	0.1902
5	0.172484	0.0153348	0.228138	0.258726	0.0305883
6	0.108213	0.00652687	0.146972	0.162319	0.0153474
7	0.055191	0.000590014	0.0827865	0.0370482	0.0457384
8	0.0232871	0.000102984	0.0349306	0.0163229	0.0186077
9	0.028975	0.000159208	0.0434625	0.0230699	0.0203926
10	0.0105925	3.22602e-05	0.0158888	0.0112944	0.00459438
11	0.00492125	1.18965e-05	0.00738188	0.00640305	0.00097883
12	0	0	0	0	0

## Sheet: N=5
			percent area
mesh		group	1	2	3	4	5
1			92.2426	5.03635	1.44934	1.10786	0.163871
2			92.4012	5.00795	1.44907	1.0107	0.131122
3			92.4887	4.69215	1.21125	0.579268	1.02864
4			92.0831	5.35772	1.06864	0.353979	1.13658
5			92.1177	5.03973	1.046	0.819631	0.976972
6			92.4925	4.58378	1.34233	0.619705	0.961731
7			92.3689	4.64316	1.44394	0.643365	0.900645
8			92.3191	4.64509	1.4659	0.642131	0.927776
9			92.3148	4.65797	1.45673	0.644553	0.925991
10			92.2694	4.67572	1.47954	0.633525	0.941789
11			92.2544	4.68225	1.48768	0.630268	0.945405
12			92.2442	4.68509	1.49016	0.634192	0.946384
			relative error
mesh	error	variance	1	2	3	4	5
1	0.329968	0.104335	0.00158643	0.351253	0.040821	0.473668	0.782513
2	0.342542	0.0875763	0.156992	0.322857	0.0410932	0.376506	0.815262
3	0.133537	0.014565	0.244525	0.00705927	0.278918	0.054924	0.0822581
4	0.345129	0.0437938	0.161091	0.672623	0.42152	0.280212	0.1902
5	0.228265	0.0284623	0.126496	0.354634	0.444166	0.185439	0.0305883
6	0.105452	0.0096519	0.248283	0.101312	0.147833	0.0144867	0.0153474
7	0.0535585	0.00182109	0.124722	0.0419359	0.0462219	0.00917375	0.0457384
8	0.0331488	0.000679705	0.0749329	0.0400023	0.0242621	0.0079392	0.0186077
9	0.0323802	0.000529293	0.0705893	0.0271268	0.0334312	0.0103613	0.0203926
10	0.0101034	8.74738e-05	0.0252585	0.00936975	0.0106279	0.000666504	0.00459438
11	0.00408875	1.2866e-05	0.0102219	0.00284001	0.00247925	0.0039238	0.00097883
12	0	0	0	0	0	0	0

## Sheet: N=10
			percent area
mesh		group	1	2	3	4	5	6	7	8	9	10
1			69.4202	22.8223	2.63004	2.26214	0.274406	0.713974	0.60513	0.699634	0.408225	0.163871
2			59.6946	31.6464	4.11415	1.77168	0.834546	0.768242	0.0286193	0.397089	0.613609	0.131122
3			62.9396	27.9259	4.17601	1.74148	0.686251	0.922762	0.146323	0.432944	0	1.02864
4			60.046	31.046	3.56216	2.25851	0.77137	0.716118	0.12215	0.341124	0	1.13658
5			59.9548	31.0868	4.26427	1.35218	0.810265	0.477989	0.25716	0.7706	0.0490305	0.976972
6			60.6644	30.5139	3.5113	1.59307	1.29688	0.706178	0.17277	0.269113	0.310588	0.961731
7			60.7982	30.3113	3.61944	1.74353	0.988189	0.670182	0.389507	0.30335	0.275668	0.900645
8			60.5886	30.5196	3.52882	1.77948	1.048	0.661569	0.404789	0.320196	0.221157	0.927776
9			60.5166	30.5563	3.55457	1.77577	1.04734	0.675425	0.398335	0.285301	0.264402	0.925991
10			60.3857	30.599	3.58267	1.83666	1.01933	0.677162	0.402071	0.296314	0.259337	0.941789
11			60.3389	30.6302	3.58273	1.84507	1.01834	0.691959	0.401484	0.288697	0.257175	0.945405
12			60.3048	30.6457	3.59416	1.84655	1.02557	0.686907	0.399701	0.295494	0.254713	0.946384
			relative error
mesh	error	variance	1	2	3	4	5	6	7	8	9	10
1	2.06423	11.5771	9.11542	7.82336	0.964115	0.415589	0.751167	0.0270667	0.205429	0.404141	0.153512	0.782513
2	0.412495	0.103641	0.610239	1.00066	0.519992	0.0748682	0.191026	0.0813351	0.371082	0.101595	0.358896	0.815262
3	0.734446	1.06892	2.63481	2.71975	0.581856	0.105068	0.339321	0.235854	0.253378	0.13745	0.254713	0.0822581
4	0.215463	0.0199324	0.258852	0.40031	0.0319987	0.411966	0.254202	0.0292104	0.277551	0.0456296	0.254713	0.1902
5	0.323377	0.0382341	0.350065	0.44108	0.670108	0.494368	0.215308	0.208918	0.142541	0.475106	0.205682	0.0305883
6	0.144281	0.0154613	0.359601	0.131755	0.0828564	0.253481	0.27131	0.019271	0.226931	0.0263813	0.0558748	0.0153474
7	0.109497	0.027889	0.493387	0.334424	0.0252846	0.103017	0.0373835	0.0167258	0.0101941	0.00785574	0.0209552	0.0457384
8	0.0672062	0.0070349	0.283817	0.126132	0.0653337	0.0670635	0.0224242	0.0253381	0.0050875	0.0247017	0.0335555	0.0186077
9	0.0486406	0.00410749	0.211744	0.0894016	0.0395869	0.070781	0.0217703	0.0114824	0.00136569	0.0101929	0.00968886	0.0203926
10	0.0177293	0.000664786	0.0808323	0.0466918	0.0114832	0.00988609	0.00624489	0.00974587	0.00237037	0.000819902	0.00462376	0.00459438
11	0.00868387	0.000101981	0.0341228	0.0155126	0.0114235	0.00147324	0.00723384	0.00505146	0.00178306	0.00679739	0.00246204	0.00097883
12	0	0	0	0	0	0	0	0	0	0	0	0

## Sheet: N=15
			percent area
MESH		group	1	2	3	4	5	6	7	8	9	10	11	12	13	14	15
1			22.1353	62.0812	6.95432	2.13188	1.8411	1.1788	0.956328	0.130239	0.713974	0.490647	0.114483	0.699634	0.408225	0	0.163871
2			27.6395	54.7787	7.75666	2.737	3.63045	0.551338	0.315502	0.652209	0.768242	0.0286193	0	0	0.791246	0.219452	0.131122
3			28.8592	46.4884	15.5179	2.75747	1.8108	0.931427	0.815562	0.409147	0.783338	0.0187605	0.146323	0.348447	0.0844974	0	1.02864
4			26.1634	50.8563	13.315	2.97142	1.98063	1.39127	0.762716	0.243231	0.716118	0.109295	0.0128556	0.213116	0.128008	0	1.13658
5			26.6309	49.495	14.344	2.48296	2.75647	0.719993	0.728017	0.425722	0.363116	0.25716	0.12109	0.64951	0	0.0490305	0.976972
6			26.2889	50.6001	13.8867	2.59631	1.73661	1.06996	0.897622	0.540036	0.459227	0.298427	0.10712	0.212947	0.19971	0.144569	0.961731
7			26.5753	50.6023	13.471	2.75652	1.84736	0.973906	0.785676	0.543698	0.445899	0.305076	0.238031	0.201718	0.175758	0.177127	0.900645
8			26.5372	50.6278	13.4588	2.82302	1.75379	1.02883	0.734843	0.595678	0.441494	0.337471	0.239139	0.149822	0.194624	0.149805	0.927776
9			26.4106	50.6682	13.5047	2.82348	1.78505	1.05262	0.728031	0.583987	0.449308	0.305547	0.230687	0.209293	0.166598	0.155866	0.925991
10			26.3038	50.6029	13.625	2.85396	1.77197	1.06862	0.718917	0.604821	0.444565	0.313845	0.222663	0.192278	0.171633	0.163256	0.941789
11			26.2413	50.6224	13.6466	2.8595	1.77823	1.07334	0.715324	0.610396	0.441706	0.308053	0.233237	0.190098	0.176248	0.158214	0.945405
12			26.2191	50.6016	13.6697	2.87488	1.77138	1.08078	0.711789	0.606376	0.450614	0.310128	0.230579	0.193456	0.172411	0.160791	0.946384
			relative error
mesh	error	variance	1	2	3	4	5	6	7	8	9	10	11	12	13	14	15
1	1.7437	10.7048	4.08384	11.4796	6.71538	0.743001	0.0697146	0.0980162	0.244539	0.476138	0.263361	0.180519	0.116097	0.506179	0.235814	0.160791	0.782513
2	1.13299	2.88649	1.42032	4.17711	5.91304	0.137875	1.85907	0.529447	0.396287	0.0458322	0.317629	0.281508	0.230579	0.193456	0.618835	0.0586605	0.815262
3	0.693528	1.46025	2.64005	4.11314	1.84825	0.117407	0.0394165	0.149358	0.103773	0.197229	0.332724	0.291367	0.0842561	0.154991	0.0879139	0.160791	0.0822581
4	0.186311	0.0128384	0.0557391	0.254758	0.3547	0.0965472	0.20925	0.31049	0.0509268	0.363145	0.265504	0.200833	0.217724	0.0196599	0.0444033	0.160791	0.1902
5	0.343208	0.117324	0.41179	1.10657	0.674317	0.391922	0.985083	0.360791	0.0162279	0.180655	0.0874971	0.052968	0.109489	0.456054	0.172411	0.111761	0.0305883
6	0.0724444	0.00772599	0.0697772	0.00145097	0.216972	0.278569	0.0347696	0.0108204	0.185833	0.0663408	0.00861365	0.0117004	0.123459	0.0194916	0.0272982	0.0162228	0.0153474
7	0.0722875	0.00936581	0.356192	0.00070056	0.198736	0.11836	0.0759801	0.106878	0.0738869	0.0626781	0.00471475	0.00505175	0.00745146	0.00826243	0.00334696	0.0163356	0.0457384
8	0.0567203	0.00772872	0.318062	0.0261708	0.210948	0.0518557	0.0175951	0.0519574	0.0230534	0.0106987	0.00912001	0.0273433	0.0085597	0.0436333	0.0222128	0.0109867	0.0186077
9	0.0405295	0.00348747	0.191477	0.066642	0.165001	0.0513972	0.013666	0.0281664	0.0162416	0.0223891	0.00130594	0.00458078	0.000107185	0.0158372	0.00581318	0.00492534	0.0203926
10	0.0133105	0.000520082	0.0846154	0.00131495	0.0446753	0.020915	0.000588707	0.0121682	0.00712822	0.0015553	0.00604884	0.00371703	0.00791586	0.00117761	0.000778396	0.00246459	0.00459438
11	0.00850974	6.15543e-05	0.0221146	0.0208172	0.0231096	0.0153736	0.006842	0.00744363	0.00353493	0.00401938	0.00890754	0.00207481	0.00265776	0.00335762	0.00383717	0.00257738	0.00097883
12	0	0	0	0	0	0	0	0	0	0	0	0	0	0	0	0	0

## Sheet: N=20
			percent area
MESH		group	1	2	3	4	5	6	7	8	9	10	11	12	13	14	15	16	17	18	19	20
1			10.4412	57.5599	17.8653	5.30442	1.90058	1.38709	1.29407	0.488093	0.894096	0.144167	0.130239	0	0.713974	0.60513	0	0.224566	0.475068	0.408225	0	0.163871
2			17.007	35.525	31.6857	5.53514	2.64829	1.62377	2.51734	0.498742	0.368098	0.0993673	0.552841	0.14686	0.649109	0.000893249	0	0	0.397089	0.613609	0	0.131122
3			17.3538	40.2362	25.5149	7.76068	1.84296	1.81265	0.994577	0.820678	0.67639	0.167997	0.409147	0.783338	0.0187605	0	0.146323	0.348447	0.0844974	0	0	1.02864
4			16.6935	40.2286	23.6931	9.7195	2.10734	1.72506	1.66919	0.841745	0.762716	0.00706836	0.358843	0.593438	0	0.109295	0.0128556	0.213116	0.128008	0	0	1.13658
5			16.7444	39.7454	25.2457	8.73446	2.11238	1.59712	1.73323	0.477958	0.638417	0.439177	0.35311	0.124879	0	0.25716	0.12109	0.64951	0	0	0.0490305	0.976972
6			16.9431	39.4215	25.4231	8.75504	2.40659	1.38456	0.968597	0.824399	0.541802	0.586955	0.423541	0.348989	0.298242	0.0921431	0.0624796	0.177314	0.121007	0.114335	0.144569	0.961731
7			16.6912	39.9745	25.305	8.44267	2.40944	1.36552	1.24167	0.735761	0.555861	0.480538	0.417122	0.337786	0.301094	0.156862	0.138077	0.154258	0.125075	0.129666	0.13726	0.900645
8			16.6965	40.004	25.2241	8.46366	2.40197	1.3866	1.20948	0.75972	0.583943	0.516228	0.394083	0.295384	0.25377	0.190033	0.210058	0.100685	0.166537	0.0988396	0.116578	0.927776
9			16.7295	39.8386	25.2421	8.51571	2.44026	1.41664	1.20359	0.781422	0.541469	0.482687	0.412436	0.349478	0.242191	0.186906	0.177074	0.138406	0.122619	0.138768	0.114142	0.925991
10			16.7634	39.6928	25.2341	8.58568	2.46105	1.39337	1.23518	0.779979	0.541897	0.500194	0.414902	0.329366	0.256763	0.191605	0.163394	0.145756	0.127637	0.129237	0.111916	0.941789
11			16.7465	39.6561	25.2505	8.59574	2.46886	1.40529	1.22727	0.791504	0.54042	0.502682	0.41202	0.334241	0.252876	0.193258	0.163465	0.145071	0.12866	0.123057	0.117179	0.945405
12			16.7625	39.6111	25.2416	8.61249	2.48071	1.40038	1.23385	0.794052	0.542849	0.493962	0.417032	0.33572	0.255596	0.192297	0.161054	0.147654	0.130491	0.124463	0.115787	0.946384
			relative error
mesh	error	variance	1	2	3	4	5	6	7	8	9	10	11	12	13	14	15	16	17	18	19	20
1	1.99367	18.4257	6.32135	17.9488	7.37626	3.30807	0.580128	0.0132823	0.0602212	0.305959	0.351247	0.349795	0.286793	0.33572	0.458378	0.412833	0.161054	0.0769128	0.344577	0.283761	0.115787	0.782513
2	0.96481	2.75873	0.244449	4.08608	6.44412	3.07735	0.167582	0.223391	1.28349	0.29531	0.174751	0.394594	0.13581	0.18886	0.393513	0.191404	0.161054	0.147654	0.266598	0.489145	0.115787	0.815262
3	0.279278	0.0584854	0.591317	0.625034	0.273317	0.851806	0.637747	0.412279	0.239273	0.0266261	0.133541	0.325964	0.00788439	0.447618	0.236836	0.192297	0.0147307	0.200793	0.0459939	0.124463	0.115787	0.0822581
4	0.326542	0.149053	0.0689671	0.617449	1.54847	1.10701	0.373371	0.32468	0.435343	0.0476928	0.219867	0.486893	0.0581885	0.257717	0.255596	0.0830023	0.148198	0.0654619	0.00248329	0.124463	0.115787	0.1902
5	0.164932	0.0228662	0.0180735	0.134291	0.00405156	0.121973	0.36833	0.19674	0.499383	0.316094	0.0955681	0.0547844	0.0639216	0.210841	0.255596	0.0648629	0.0399636	0.501856	0.130491	0.124463	0.0667564	0.0305883
6	0.0764185	0.0060327	0.180597	0.18961	0.181482	0.142551	0.0741154	0.015819	0.265253	0.0303477	0.001047	0.0929933	0.0065095	0.0132693	0.0426457	0.100154	0.0985743	0.0296604	0.00948401	0.010128	0.0287816	0.0153474
7	0.0528556	0.00688145	0.0713427	0.363408	0.063379	0.169812	0.071268	0.0348519	0.00782156	0.0582909	0.0130126	0.0134233	9.08242e-05	0.00206599	0.0454975	0.0354345	0.0229771	0.00660396	0.00541642	0.00520297	0.0214731	0.0457384
8	0.0542106	0.00746455	0.0659715	0.392904	0.0175131	0.148831	0.0787418	0.0137736	0.0243675	0.0343316	0.0410942	0.0222665	0.022949	0.0403359	0.00182632	0.00226413	0.0490045	0.0469686	0.0360456	0.0256238	0.000791508	0.0186077
9	0.0288306	0.00263855	0.0329956	0.227489	0.000467903	0.0967748	0.0404454	0.0162667	0.0302576	0.0126296	0.00137961	0.0112743	0.00459557	0.0137576	0.0134049	0.00539102	0.0160203	0.00924786	0.00787259	0.0143043	0.00164449	0.0203926
10	0.0098419	0.000331711	0.000938044	0.0816429	0.00752589	0.0268048	0.0196646	0.00700679	0.00132559	0.0140726	0.000952114	0.00623269	0.00212975	0.00635409	0.00116686	0.000691902	0.00233964	0.00189725	0.00285415	0.0047732	0.00387063	0.00459438
11	0.0072225	0.000102507	0.0160581	0.0449587	0.00887343	0.0167425	0.0118531	0.00490976	0.00658418	0.0025475	0.00242859	0.0087199	0.00501195	0.00147936	0.00271978	0.000960691	0.0024107	0.00258288	0.00183146	0.00140663	0.00139181	0.00097883
12	0	0	0	0	0	0	0	0	0	0	0	0	0	0	0	0	0	0	0	0	0	0

## Sheet: N=25
			percent area
MESH		group	1	2	3	4	5	6	7	8	9	10	11	12	13	14	15	16	17	18	19	20	21	22	23	24	25
1			7.38805	28.7049	43.6336	6.48648	4.48478	1.54475	1.87447	0.755568	1.34927	0.0187655	0.894096	0.144167	0.130239	0	0	0.713974	0.490647	0.114483	0	0.224566	0.475068	0	0.408225	0	0.163871
2			14.8787	22.7258	32.296	17.0743	2.77807	2.64829	0.615015	2.43892	1.08718	0.498742	0.368098	0	0.0993673	0.670162	0.0295391	0.621383	0.0286193	0	0	0	0	0.397089	0.613609	0	0.131122
3			12.9393	23.6789	33.9455	16.1244	3.6464	2.15422	1.36395	1.18895	0.474182	0.820678	0.67639	0.167997	0	0.409147	0.72115	0.0809483	0	0	0.146323	0.348447	0.0844974	0	0	0	1.02864
4			14.5004	22.1262	32.0484	16.8519	4.80779	1.74833	1.24602	1.32504	1.18219	0.823411	0.781049	0	0.243231	0.476262	0.239856	0	0.109295	0	0.0128556	0.213116	0.0273457	0.100662	0	0	1.13658
5			13.9154	22.1908	33.5902	13.8792	6.72744	1.81459	1.13193	2.0562	0.606891	0.353967	0.598554	0.292183	0.310849	0.477989	0	0	0.25716	0	0.12109	0.64951	0	0	0	0.0490305	0.976972
6			13.8722	22.5486	33.1066	15.1887	5.6287	2.14761	1.0526	1.14462	0.73518	0.668262	0.433079	0.550041	0.39609	0.301315	0.254541	0.257619	0.0881249	0.0446409	0.109152	0.0793204	0.120645	0.111779	0.151205	0.0476037	0.961731
7			13.6496	22.8931	33.2276	14.7707	5.74748	2.08034	1.20499	1.15505	0.789301	0.580594	0.50935	0.403873	0.336903	0.292975	0.265999	0.222905	0.167282	0.157878	0.102757	0.125472	0.10949	0.113287	0.0718309	0.120528	0.900645
8			13.6605	22.8466	33.3503	14.653	5.72762	2.08108	1.31095	1.00698	0.902964	0.577647	0.456685	0.389862	0.376123	0.327741	0.225126	0.232901	0.187649	0.116362	0.162418	0.0788271	0.119735	0.0995636	0.0895022	0.0920849	0.927776
9			13.6494	22.7545	33.2166	14.7881	5.78675	2.11937	1.2405	1.07218	0.859377	0.626068	0.456508	0.403333	0.342207	0.338746	0.27611	0.196186	0.170876	0.132609	0.139554	0.088153	0.131232	0.0868374	0.0994989	0.0992781	0.925991
10			13.6561	22.6575	33.12	14.7952	5.9089	2.13176	1.27825	1.01966	0.913651	0.608675	0.453226	0.402259	0.370837	0.326682	0.26	0.19782	0.172965	0.151231	0.126218	0.114155	0.106948	0.100024	0.0956513	0.0905289	0.941789
11			13.6406	22.6253	33.1437	14.7622	5.94065	2.14187	1.27546	1.02202	0.913972	0.612205	0.462451	0.396147	0.37279	0.32931	0.261308	0.207189	0.165331	0.151757	0.121577	0.115256	0.108339	0.0939244	0.106269	0.0849018	0.945405
12			13.6541	22.5857	33.1135	14.7811	5.95879	2.15094	1.27871	1.0218	0.918894	0.611459	0.4577	0.396527	0.372237	0.333338	0.26274	0.206132	0.173944	0.141772	0.122475	0.114774	0.107137	0.100949	0.10059	0.0882658	0.946384
			relative error
mesh	error	variance	1	2	3	4	5	6	7	8	9	10	11	12	13	14	15	16	17	18	19	20	21	22	23	24	25
1	1.57694	8.30229	6.26607	6.11922	10.5201	8.29464	1.47401	0.606194	0.595764	0.266235	0.430381	0.592693	0.436396	0.25236	0.241998	0.333338	0.26274	0.507842	0.316703	0.0272895	0.122475	0.109793	0.367931	0.100949	0.307635	0.0882658	0.782513
2	0.584152	0.560577	1.22459	0.140117	0.817562	2.29321	3.18072	0.497353	0.663695	1.41711	0.168282	0.112716	0.089602	0.396527	0.27287	0.336824	0.233201	0.415251	0.145325	0.141772	0.122475	0.114774	0.107137	0.29614	0.513019	0.0882658	0.815262
3	0.386084	0.279631	0.714836	1.09326	0.831936	1.34327	2.31239	0.00328499	0.0852417	0.16715	0.444712	0.209219	0.21869	0.228529	0.372237	0.075809	0.45841	0.125184	0.173944	0.141772	0.023848	0.233673	0.02264	0.100949	0.10059	0.0882658	0.0822581
4	0.356033	0.221815	0.846293	0.459479	1.06512	2.07082	1.151	0.402607	0.0326905	0.303241	0.263298	0.211952	0.323349	0.396527	0.129006	0.142924	0.0228844	0.206132	0.0646494	0.141772	0.10962	0.0983417	0.0797917	0.000286991	0.10059	0.0882658	0.1902
5	0.278001	0.0752467	0.26127	0.394846	0.476647	0.901872	0.768651	0.336346	0.146782	1.0344	0.312003	0.257492	0.140854	0.104344	0.0613878	0.144651	0.26274	0.206132	0.0832157	0.141772	0.00138485	0.534736	0.107137	0.100949	0.10059	0.0392353	0.0305883
6	0.0899581	0.0115189	0.218079	0.0370695	0.00693332	0.407625	0.330089	0.00332802	0.226108	0.122814	0.183715	0.0568036	0.0246215	0.153515	0.0238529	0.0320231	0.008199	0.0514871	0.085819	0.0971314	0.0133236	0.0354535	0.0135078	0.0108296	0.0506151	0.0406621	0.0153474
7	0.0566011	0.0053729	0.00447406	0.30744	0.114046	0.0103806	0.211314	0.0705947	0.0737175	0.133243	0.129593	0.0308649	0.0516502	0.0073465	0.0353338	0.0403635	0.00325894	0.0167733	0.00666238	0.0161055	0.0197178	0.0106984	0.00235281	0.0123377	0.0287591	0.0322617	0.0457384
8	0.050963	0.00596757	0.00640011	0.26094	0.236735	0.128117	0.23117	0.0698553	0.0322436	0.0148251	0.0159299	0.0338112	0.00101495	0.0066647	0.00388606	0.00559748	0.0376141	0.0267689	0.0137047	0.0254102	0.0399426	0.0359467	0.0125977	0.00138565	0.0110878	0.00381904	0.0186077
9	0.0337359	0.00219901	0.00474516	0.168849	0.103108	0.00699264	0.172043	0.0315714	0.038206	0.0503722	0.0595169	0.0146097	0.00119197	0.00680616	0.0300302	0.00540742	0.0133691	0.00994645	0.003068	0.00916308	0.0170784	0.0266208	0.0240944	0.0141118	0.0010911	0.0110123	0.0203926
10	0.00924239	0.00027054	0.00195595	0.0717914	0.00645105	0.014134	0.0498922	0.0191816	0.000459145	0.00214216	0.00524358	0.00278363	0.004474	0.00573278	0.0013997	0.00665599	0.00274046	0.00831226	0.000978605	0.00945914	0.00374254	0.000618943	0.000189461	0.00092499	0.00493866	0.00226301	0.00459438
11	0.00756082	9.80321e-05	0.013537	0.0396378	0.0302	0.0188735	0.0181373	0.00906809	0.00325365	0.000218501	0.00492241	0.000746198	0.00475073	0.000379375	0.000552694	0.00402803	0.00143214	0.00105672	0.00861328	0.00998479	0.000897721	0.000482354	0.00120112	0.00702492	0.00567943	0.00336406	0.00097883
12	0	0	0	0	0	0	0	0	0	0	0	0	0	0	0	0	0	0	0	0	0	0	0	0	0	0	0

## Sheet: N=50
			percent area
MESH		group	1	2	3	4	5	6	7	8	9	10	11	12	13	14	15	16	17	18	19	20	21	22	23	24	25	26	27	28	29	30	31	32	33	34	35	36	37	38	39	40	41	42	43	44	45	46	47
1			3.9305	3.45756	6.22483	20.0797	31.3915	14.2541	4.87834	1.93953	3.23818	0.688791	2.15958	0	0.828824	0.231294	1.14301	0.215095	0.371057	0.72071	0.488093	0	0.0819353	0.812161	0	0.144167	0	0	0.130239	0	0	0	0	0.713974	0	0	0.490647	0.114483	0	0	0	0.224566	0	0.475068	0	0	0	0.408225	0
2			9.09711	5.75494	5.19401	15.65	14.561	18.6778	13.4833	3.58944	2.20492	1.54035	1.58808	0.978978	0.081237	0.510655	0.10436	1.9433	1.01001	0.572785	0.384681	0.114062	0.0525955	0.315502	0	0	0.0993673	0	0.552841	0	0.117321	0	0.0295391	0.621383	0	0.0277261	0.000893249	0	0	0	0	0	0	0	0	0.397089	0	0.394157	0.219452
3			8.68708	4.2522	7.68989	14.9366	17.4044	15.565	6.81243	10.2031	2.82431	1.6541	0.892608	0.953079	0.833678	0.914507	0.641248	0.777295	0.36127	0.112912	0.820678	0	0.028825	0.549776	0.0977887	0.0364175	0.13158	0	0	0.409147	0.0557651	0.665385	0.0621878	0.0187605	0	0	0	0	0	0.146323	0	0.348447	0	0	0.0844974	0	0	0	0
4			8.86596	4.70872	5.59163	15.8476	20.4797	12.8163	8.70981	7.36625	3.35354	2.50536	0.84709	0.902745	0.447357	0.864085	0.792098	0.301382	0.887154	0.412434	0.168373	0.58166	0.228807	0.441318	0.321398	0	0.00706836	0	0.236163	0	0.476262	0	0.239856	0	0	0.109295	0	0	0	0.0128556	0.213116	0	0	0	0.0273457	0.100662	0	0	0
5			7.5836	6.17565	6.27733	14.635	20.5916	12.5646	8.29827	6.64096	5.23943	2.03185	1.00336	0.798028	0.74278	0.370575	0.699	0.660969	1.15431	0.445496	0.353967	0	0.16272	0.435834	0	0.292183	0.310849	0	0	0.114873	0.363116	0	0	0	0	0.25716	0	0	0	0	0.12109	0.245859	0.403651	0	0	0	0	0	0
6			7.61738	5.92288	6.24894	14.9714	19.5296	13.6337	8.96516	7.05818	4.28501	1.73312	1.27999	0.928645	0.799408	0.398629	0.763002	0.340216	0.347943	0.4793	0.426442	0.256758	0.192918	0.193824	0.206236	0.308927	0.312985	0.0984263	0.245287	0.071973	0.247322	0.0747989	0.0897896	0.167105	0.0905137	0.0406228	0.0475022	0.0446409	0	0.0400046	0.069147	0.0349268	0.0957152	0.0356332	0.0336904	0.111779	0	0.0542402	0.0969648
7			7.60891	5.86312	6.51861	15.0041	19.6126	13.5242	9.04602	6.55301	4.36063	1.94615	1.13734	1.01098	0.708247	0.511134	0.55402	0.554625	0.503121	0.397321	0.300052	0.30984	0.202292	0.296727	0.159026	0.209705	0.195228	0.148871	0.208296	0.111521	0.122514	0.148474	0.138761	0.0810934	0.156469	0.0624271	0.0412354	0.100307	0.0579238	0.0553853	0.0552749	0.075407	0.0332003	0.0622505	0.0472397	0.0465775	0.0667096	0.0237965	0.0480344
8			7.68468	5.7598	6.42122	15.0071	19.7149	13.5275	9.04972	6.48517	4.40581	1.90823	1.2181	0.899322	0.747941	0.6172	0.536916	0.462557	0.553247	0.363421	0.357828	0.31009	0.198558	0.230168	0.219232	0.171689	0.252869	0.161164	0.174567	0.12083	0.171106	0.121497	0.0832508	0.142763	0.0800368	0.0999036	0.0804076	0.0359678	0.0686509	0.0835996	0.0722313	0.0287981	0.0432567	0.0564571	0.0674942	0.0615165	0.033831	0.0422015	0.0473007
9			7.64297	5.78233	6.49426	14.8786	19.6485	13.4601	9.17215	6.48808	4.41725	1.96534	1.22783	0.918751	0.741451	0.569485	0.53547	0.518067	0.495764	0.404172	0.326596	0.333201	0.2244	0.204498	0.222338	0.195422	0.199655	0.171428	0.175105	0.143571	0.162144	0.117635	0.121038	0.10771	0.0900205	0.0711255	0.0851819	0.0628391	0.0784362	0.0714654	0.0607156	0.0394764	0.0432951	0.0837516	0.0412334	0.0347306	0.0556122	0.0604595	0.0356753
10			7.62145	5.81478	6.45721	14.7583	19.6728	13.3787	9.20337	6.4873	4.4899	1.96814	1.24327	0.931183	0.770009	0.589182	0.533563	0.471219	0.52937	0.42397	0.333841	0.308004	0.240622	0.220239	0.200635	0.196809	0.194661	0.193255	0.155548	0.162592	0.154772	0.127874	0.10508	0.11239	0.0950886	0.0810197	0.0821845	0.0606399	0.0751947	0.0534515	0.0665087	0.053703	0.0579361	0.0475076	0.0543465	0.0449985	0.052996	0.0486031	0.0449548
11			7.61641	5.82068	6.45658	14.7179	19.6602	13.3759	9.21608	6.47701	4.49672	2.00301	1.23822	0.938845	0.77182	0.580467	0.537676	0.479539	0.513877	0.428641	0.336672	0.313028	0.242135	0.209698	0.211821	0.193469	0.195466	0.182764	0.173974	0.158528	0.147915	0.134315	0.107371	0.106843	0.0927947	0.0835827	0.0769383	0.0742277	0.072721	0.058042	0.0555932	0.0624619	0.0509923	0.0492971	0.0540604	0.0490768	0.0469083	0.0474394	0.0556122
12			7.60769	5.84351	6.44642	14.7039	19.6435	13.3495	9.22617	6.47668	4.51781	2.00438	1.24504	0.940948	0.767663	0.592062	0.533535	0.473007	0.513845	0.437635	0.337301	0.307063	0.249782	0.214382	0.208602	0.190862	0.197914	0.184222	0.172248	0.149935	0.154253	0.132899	0.107494	0.109055	0.0943789	0.0853139	0.0773468	0.0729223	0.0682064	0.0607589	0.0554735	0.0576392	0.0537797	0.055255	0.0474702	0.0512105	0.049123	0.0492519	0.0504045
			relative error
mesh	error	variance	1	2	3	4	5	6	7	8	9	10	11	12	13	14	15	16	17	18	19	20	21	22	23	24	25	26	27	28	29	30	31	32	33	34	35	36	37	38	39	40	41	42	43	44	45	46	47
1	0.906027	3.94757	3.67719	2.38596	0.221585	5.37577	11.748	0.904553	4.34783	4.53715	1.27963	1.31559	0.914546	0.940948	0.0611613	0.360768	0.609474	0.257912	0.142789	0.283076	0.150792	0.307063	0.167847	0.597779	0.208602	0.0466953	0.197914	0.184222	0.0420096	0.149935	0.154253	0.132899	0.107494	0.604919	0.0943789	0.0853139	0.4133	0.0415605	0.0682064	0.0607589	0.0554735	0.166927	0.0537797	0.419813	0.0474702	0.0512105	0.049123	0.358973	0.0504045
2	0.656195	1.51564	1.48942	0.088579	1.25241	0.946082	5.08254	5.32828	4.25718	2.88724	2.31289	0.464028	0.343042	0.03803	0.686426	0.0814067	0.429176	1.47029	0.496167	0.13515	0.0473793	0.193001	0.197187	0.10112	0.208602	0.190862	0.0985469	0.184222	0.380593	0.149935	0.0369324	0.132899	0.077955	0.512327	0.0943789	0.0575879	0.0764536	0.0729223	0.0682064	0.0607589	0.0554735	0.0576392	0.0537797	0.055255	0.0474702	0.345878	0.049123	0.344905	0.169047
3	0.456649	0.593489	1.07939	1.59131	1.24347	0.232676	2.23907	2.2155	2.41375	3.72645	1.69349	0.350283	0.352427	0.0121302	0.0660149	0.322445	0.107712	0.304288	0.152575	0.324723	0.483377	0.307063	0.220957	0.335394	0.110814	0.154445	0.0663345	0.184222	0.172248	0.259213	0.098488	0.532486	0.0453063	0.0902949	0.0943789	0.0853139	0.0773468	0.0729223	0.0682064	0.0855644	0.0554735	0.290808	0.0537797	0.055255	0.0370272	0.0512105	0.049123	0.0492519	0.0504045
4	0.283459	0.115868	1.25827	1.13479	0.854789	1.14365	0.836216	0.533181	0.516362	0.889564	1.16427	0.500981	0.397945	0.0382039	0.320306	0.272023	0.258563	0.171626	0.373309	0.0252001	0.168929	0.274597	0.0209751	0.226935	0.112796	0.190862	0.190846	0.184222	0.0639144	0.149935	0.322009	0.132899	0.132362	0.109055	0.0943789	0.0239806	0.0773468	0.0729223	0.0682064	0.0479033	0.157642	0.0576392	0.0537797	0.055255	0.0201245	0.0494518	0.049123	0.0492519	0.0504045
5	0.186673	0.0516989	0.0240932	0.332137	0.169094	0.0689328	0.948057	0.784946	0.927904	0.164274	0.721617	0.0274679	0.241673	0.142921	0.0248834	0.221487	0.165464	0.187962	0.640463	0.00786193	0.0166653	0.307063	0.0870627	0.221452	0.208602	0.101321	0.112935	0.184222	0.172248	0.0350619	0.208863	0.132899	0.107494	0.109055	0.0943789	0.171846	0.0773468	0.0729223	0.0682064	0.0607589	0.0656168	0.18822	0.349871	0.055255	0.0474702	0.0512105	0.049123	0.0492519	0.0504045
6	0.0916902	0.0114593	0.00969472	0.0793699	0.197481	0.267439	0.113878	0.284194	0.261013	0.581497	0.232804	0.271256	0.0349577	0.0123029	0.0317447	0.193433	0.229466	0.132791	0.165902	0.0416657	0.0891407	0.0503047	0.056864	0.0205589	0.00236663	0.118065	0.115071	0.0857952	0.0730381	0.0779616	0.0930689	0.0581	0.0177045	0.0580499	0.00386517	0.0446912	0.0298447	0.0282814	0.0682064	0.0207543	0.0136735	0.0227125	0.0419355	0.0196218	0.0137798	0.0605683	0.049123	0.00498838	0.0465603
7	0.0467944	0.00308651	0.00122141	0.0196059	0.0721946	0.300205	0.0308974	0.174714	0.18015	0.0763219	0.157181	0.0582294	0.107692	0.0700302	0.0594159	0.0809281	0.020485	0.081618	0.0107247	0.0403131	0.0372496	0.00277687	0.0474904	0.0823448	0.0495766	0.0188425	0.00268606	0.0353502	0.0360479	0.0384135	0.0317389	0.0155751	0.0312671	0.0279621	0.0620905	0.0228869	0.0361114	0.0273849	0.0102825	0.0053736	0.000198616	0.0177678	0.0205794	0.00699548	0.000230484	0.00463304	0.0175866	0.0254554	0.00237005
8	0.0383751	0.00300703	0.0769927	0.0837104	0.0251996	0.303174	0.0714399	0.17799	0.176454	0.00848845	0.111999	0.0961484	0.0269345	0.0416263	0.0197216	0.0251382	0.00338069	0.0104504	0.0394012	0.0742131	0.0205265	0.00302733	0.0512246	0.0157856	0.0106302	0.0191731	0.0549551	0.0230576	0.00231908	0.0291046	0.0168531	0.0114023	0.0242433	0.0337075	0.0143421	0.0145896	0.00306078	0.0369545	0.000444489	0.0228407	0.0167578	0.0288412	0.010523	0.00120208	0.020024	0.010306	0.015292	0.00705033	0.00310378
9	0.023961	0.000964091	0.0352823	0.0611825	0.0478421	0.174634	0.00500399	0.110564	0.0540242	0.0113934	0.100556	0.0390394	0.01721	0.0221976	0.0262116	0.0225769	0.00193424	0.0450596	0.0180817	0.0334629	0.0107051	0.0261379	0.0253824	0.00988405	0.013736	0.00455964	0.00174136	0.0127938	0.00285686	0.00636356	0.00789054	0.0152644	0.0135442	0.00134522	0.00435844	0.0141885	0.00783509	0.0100832	0.0102299	0.0107065	0.00524207	0.0181628	0.0104846	0.0284966	0.00623677	0.01648	0.00648921	0.0112077	0.0147291
10	0.00997332	0.000114654	0.0137597	0.0287309	0.0107925	0.0544181	0.029304	0.0291891	0.0228021	0.0106208	0.0279073	0.0362354	0.0017695	0.00976519	0.00234627	0.00287997	2.71162e-05	0.00178871	0.0155251	0.0136645	0.00345992	0.000941421	0.00915995	0.00585616	0.00796711	0.00594686	0.0032528	0.00903316	0.0167009	0.0126575	0.000519352	0.00502475	0.00241398	0.00333446	0.000709658	0.0042942	0.00483765	0.0122824	0.00698827	0.00730741	0.0110352	0.00393618	0.00415642	0.00774735	0.00687633	0.00621201	0.00387301	0.000648752	0.00544964
11	0.0054854	3.50512e-05	0.00871763	0.0228384	0.0101613	0.0139498	0.0166551	0.0263838	0.0100975	0.000320924	0.0210875	0.00136328	0.00681235	0.00210305	0.00415657	0.0115945	0.00414047	0.00653157	3.11445e-05	0.00899351	0.00062947	0.00596537	0.00764721	0.00468496	0.00321867	0.00260683	0.00244844	0.00145758	0.00172609	0.0085937	0.00633851	0.0014156	0.000122801	0.0022126	0.00158423	0.00173124	0.000408567	0.00130541	0.0045146	0.00271689	0.000119682	0.00482267	0.00278742	0.00595792	0.00659023	0.00213374	0.00221463	0.00181245	0.00520772
12	0	0	0	0	0	0	0	0	0	0	0	0	0	0	0	0	0	0	0	0	0	0	0	0	0	0	0	0	0	0	0	0	0	0	0	0	0	0	0	0	0	0	0	0	0	0	0	0	0
[truncated: 3 more columns]

## Sheet: N=75
			percent area
MESH		group	1	2	3	4	5	6	7	8	9	10	11	12	13	14	15	16	17	18	19	20	21	22	23	24	25	26	27	28	29	30	31	32	33	34	35	36	37	38	39	40	41	42	43	44	45	46	47
1			0.435665	4.07718	2.85038	3.20818	9.88131	12.6754	25.5955	9.27742	11.3371	4.46732	2.06093	0.289626	1.72074	1.51743	0.250249	1.52637	1.07176	0	0.828824	0	0.231294	1.14301	0.0127906	0.202304	0.344059	0.0269975	0.72071	0.488093	0	0	0	0.130217	0.76388	0	0	0.092035	0.0521318	0	0	0	0.130239	0	0	0	0	0	0.713974
2			5.71831	4.8222	4.31153	2.45079	8.37456	9.28141	10.1075	14.6057	9.13025	9.08571	5.79128	2.32745	1.51743	1.60367	0.625053	0.421945	1.86021	0.284898	0.081237	0	0.510655	0.10436	0.831915	1.11138	0.49562	1.08718	0	0.0639646	0.434778	0	0	0.0525955	0.133165	0.182338	0	0	0	0.0993673	0	0	0.552841	0	0.117321	0	0	0	0.650922
3			4.68896	5.71696	2.53336	4.74083	6.33712	11.157	11.0827	15.4123	5.75446	7.15875	2.54073	8.24	2.60487	0.847539	0.420664	1.6293	0.589535	0.41975	0.664449	0.169229	0.914507	0.641248	0.181452	0.0754482	0.881665	0.030988	0.0819239	0	0.820678	0	0	0.028825	0.417795	0.22977	0	0.0364175	0.13158	0	0	0	0.288484	0.120663	0	0.0557651	0.227859	0.437526	0.0621878
4			5.36353	4.08284	3.51878	3.99878	5.83649	11.9044	12.214	10.9965	9.88393	8.11667	1.8916	5.50533	3.35028	2.3713	1.21054	0.347048	0.522882	0.879905	0.306785	0.140572	0.801839	0.107748	0.746596	0.201024	0.354849	0.632662	0.412434	0.137095	0.0312775	0.543712	0.266756	0	0.234577	0.528139	0	0	0	0.00706836	0	0.236163	0	0	0.476262	0	0	0.239856	0
5			4.32346	6.3578	3.06138	3.25283	6.57601	11.1001	13.8864	8.96669	9.93924	6.43548	6.12887	2.56392	4.5082	1.37158	1.47616	0.521844	0.705319	0.664281	0.74278	0	0.370575	0.480387	0.425735	0.453847	0.992914	0.287833	0.319058	0	0.353967	0	0	0.351578	0.246976	0	0.109993	0.18219	0	0.310849	0	0	0	0.114873	0.255195	0.107922	0	0	0
6			4.79592	5.2611	3.45127	3.95106	6.07647	10.6575	14.105	10.6076	8.27257	7.6793	4.88897	4.14797	2.93624	2.23295	0.806397	1.12264	0.533571	0.647496	0.511896	0.325309	0.360832	0.517821	0.293831	0.291566	0.31571	0.177601	0.285591	0.185889	0.461338	0.0843143	0.130514	0.0624045	0.104127	0.243454	0.104529	0.256877	0.188635	0.179416	0	0.193228	0.0954194	0.071973	0.105001	0.142321	0.0747989	0.0897896	0
7			5.0788	4.86587	3.3841	3.8698	6.334	10.7972	14.1034	10.2503	8.756	7.0745	4.70168	4.1079	3.35719	2.08864	1.13027	0.8536	0.734821	0.659286	0.429965	0.448212	0.325265	0.397555	0.309486	0.377543	0.367057	0.313826	0.240706	0.226468	0.187445	0.192976	0.151829	0.165869	0.199599	0.126973	0.104788	0.144342	0.154743	0.116863	0.0732436	0.146796	0.111698	0.0679899	0.106047	0.0931991	0.0823384	0.0716543	0.0920512
8			5.11782	4.80157	3.42036	3.88338	6.27753	10.7812	13.9743	10.3775	8.81635	7.01578	4.81157	4.06911	3.42414	1.99666	1.04909	0.934032	0.690844	0.619911	0.495915	0.458738	0.378661	0.3792	0.276639	0.36762	0.310761	0.351819	0.245139	0.254578	0.208103	0.204959	0.148078	0.135355	0.1432	0.163597	0.141836	0.0927206	0.146078	0.161257	0.12562	0.0849019	0.12453	0.0788845	0.114949	0.09099	0.0931974	0.0454288	0.0612648
9			5.03883	4.83991	3.43111	3.94099	6.18693	10.7962	13.8886	10.4321	8.73934	7.09008	4.79196	4.12452	3.31901	2.08446	1.07733	0.921819	0.703538	0.644646	0.482034	0.461077	0.366232	0.361424	0.310871	0.380628	0.324411	0.334662	0.228612	0.241401	0.223764	0.213981	0.159053	0.153032	0.11495	0.170841	0.124248	0.136936	0.133165	0.117921	0.118857	0.100143	0.132216	0.0974725	0.0991501	0.0935964	0.0832439	0.0848464	0.0726618
10			5.0162	4.83394	3.51347	3.88073	6.09786	10.7508	13.9146	10.4168	8.63378	7.15706	4.76691	4.12366	3.37101	2.13053	1.1057	0.937836	0.70475	0.636455	0.502665	0.4613	0.374168	0.37496	0.30917	0.328913	0.343685	0.33914	0.267533	0.229549	0.214488	0.204877	0.169996	0.156091	0.143129	0.141036	0.126024	0.138719	0.127641	0.12513	0.128961	0.109212	0.108152	0.100649	0.10934	0.0950065	0.0927692	0.0671826	0.0739924
11			5.00515	4.84015	3.52319	3.87845	6.0739	10.7209	13.9076	10.4507	8.60463	7.14556	4.79646	4.12344	3.37062	2.12807	1.12376	0.934248	0.716742	0.632189	0.50149	0.464376	0.37491	0.368502	0.320994	0.331343	0.329897	0.348971	0.260279	0.243611	0.20998	0.201505	0.171361	0.164725	0.136274	0.14591	0.125277	0.132866	0.128543	0.128919	0.125409	0.11186	0.107539	0.0994064	0.11249	0.0910566	0.0909238	0.0678261	0.0799137
12			4.99942	4.8499	3.533	3.86082	6.04974	10.7242	13.9038	10.4327	8.59031	7.1743	4.77946	4.13036	3.36254	2.15678	1.12749	0.935224	0.710948	0.641326	0.505556	0.463562	0.379494	0.365752	0.317694	0.328658	0.32487	0.357211	0.265836	0.242384	0.207344	0.206922	0.174489	0.159544	0.140757	0.14346	0.121801	0.13597	0.125623	0.129031	0.125487	0.110232	0.115646	0.0942028	0.112656	0.0971679	0.0867499	0.074526	0.0719383
			relative error
mesh	error	variance	1	2	3	4	5	6	7	8	9	10	11	12	13	14	15	16	17	18	19	20	21	22	23	24	25	26	27	28	29	30	31	32	33	34	35	36	37	38	39	40	41	42	43	44	45	46	47
1	0.687376	2.5524	4.56376	0.77272	0.682622	0.652641	3.83157	1.95127	11.6917	1.1553	2.74679	2.70698	2.71853	3.84074	1.6418	0.639347	0.877238	0.591141	0.36081	0.641326	0.323269	0.463562	0.148201	0.777257	0.304903	0.126353	0.0191889	0.330213	0.454874	0.245709	0.207344	0.206922	0.174489	0.0293276	0.623123	0.14346	0.121801	0.0439345	0.0734909	0.129031	0.125487	0.110232	0.0145926	0.0942028	0.112656	0.0971679	0.0867499	0.074526	0.642036
2	0.456901	0.600802	0.718892	0.0276976	0.77853	1.41003	2.32482	1.44277	3.79631	4.17301	0.539938	1.91141	1.01182	1.80291	1.84512	0.553108	0.502435	0.513279	1.14926	0.356429	0.424319	0.463562	0.131161	0.261393	0.514221	0.782725	0.17075	0.729966	0.265836	0.178419	0.227434	0.206922	0.174489	0.106949	0.00759174	0.0388773	0.121801	0.13597	0.125623	0.0296633	0.125487	0.110232	0.437195	0.0942028	0.00466443	0.0971679	0.0867499	0.074526	0.578983
3	0.427025	0.774165	0.31046	0.867062	0.999641	0.880008	0.287379	0.432788	2.82104	4.97959	2.83585	0.0155502	2.23873	4.10963	0.757672	1.30924	0.706824	0.694081	0.121413	0.221576	0.158894	0.294334	0.535013	0.275495	0.136242	0.253209	0.556795	0.326223	0.183912	0.242384	0.613334	0.206922	0.174489	0.130719	0.277038	0.0863097	0.121801	0.0995521	0.00595701	0.129031	0.125487	0.110232	0.172838	0.0264605	0.112656	0.0414028	0.141109	0.363	0.0097505
4	0.259973	0.202917	0.364114	0.767052	0.0142194	0.137959	0.213253	1.18022	1.68984	0.563729	1.29362	0.942369	2.88786	1.37497	0.0122671	0.214521	0.0830485	0.588177	0.188066	0.238578	0.198771	0.32299	0.422345	0.258004	0.428902	0.127633	0.029979	0.275452	0.146598	0.105289	0.176067	0.336789	0.0922664	0.159544	0.0938203	0.384679	0.121801	0.13597	0.125623	0.121962	0.125487	0.12593	0.115646	0.0942028	0.363605	0.0971679	0.0867499	0.16533	0.0719383
5	0.257606	0.150414	0.675959	1.50791	0.471623	0.607998	0.526268	0.375905	0.0173891	1.46604	1.34893	0.738826	1.34942	1.56644	1.14566	0.785198	0.348674	0.41338	0.00562864	0.0229549	0.237224	0.463562	0.00891911	0.114635	0.108041	0.12519	0.668043	0.0693777	0.053222	0.242384	0.146622	0.206922	0.174489	0.192033	0.10622	0.14346	0.0118081	0.0462202	0.125623	0.181818	0.125487	0.110232	0.115646	0.0206699	0.142538	0.010754	0.0867499	0.074526	0.0719383
6	0.0816887	0.0108236	0.203496	0.411208	0.0817329	0.0902395	0.0267237	0.0667004	0.201218	0.174854	0.317738	0.504994	0.10951	0.0176068	0.426306	0.0761645	0.32109	0.187413	0.177376	0.0061697	0.00633995	0.138253	0.0186624	0.152069	0.0238632	0.037092	0.00916074	0.17961	0.019755	0.0564949	0.253994	0.122608	0.0439752	0.0971397	0.0366298	0.0999937	0.0172725	0.120908	0.0630127	0.0503852	0.125487	0.0829952	0.0202268	0.0222298	0.00765522	0.0451531	0.011951	0.0152635	0.0719383
7	0.0364146	0.00252394	0.079375	0.015972	0.148901	0.00897855	0.284255	0.0730518	0.199606	0.182418	0.165691	0.0998033	0.0777774	0.0224627	0.00535635	0.0681409	0.00278651	0.0816245	0.0238729	0.0179591	0.0755902	0.0153501	0.0542288	0.0318029	0.00820751	0.048885	0.0421867	0.0433845	0.0251301	0.0159158	0.0198996	0.0139457	0.0226598	0.00632461	0.0588423	0.0164871	0.0170128	0.00837206	0.0291205	0.0121675	0.0522435	0.036564	0.00394847	0.0262129	0.00660971	0.0039688	0.00441155	0.00287177	0.0201129
8	0.0319087	0.00206732	0.118399	0.0483255	0.112641	0.0225593	0.227789	0.0570205	0.0705082	0.055179	0.226037	0.158528	0.0321114	0.0612552	0.0616003	0.160122	0.0784009	0.00119262	0.0201034	0.0214156	0.00964019	0.00482436	0.000832711	0.0134476	0.0410552	0.0389624	0.0141092	0.00539155	0.0206976	0.0121939	0.000758492	0.00196286	0.0264108	0.0241894	0.00244345	0.0201362	0.0200347	0.0432489	0.0204558	0.0322261	0.000132922	0.0253304	0.00888347	0.0153183	0.00229312	0.00617791	0.00644749	0.0290973	0.0106735
9	0.0207454	0.000854811	0.0394083	0.00998668	0.101892	0.0801685	0.137187	0.0720061	0.0152	0.000586173	0.149034	0.0842245	0.0125028	0.00584436	0.0435327	0.0723204	0.0501561	0.0134052	0.00740974	0.00331912	0.0235217	0.00248505	0.0132626	0.00432856	0.00682291	0.0519704	0.00045942	0.0225488	0.0372248	0.000982837	0.0164201	0.00705909	0.0154358	0.00651252	0.0258062	0.0273803	0.00244662	0.000966065	0.0075428	0.0111091	0.00662977	0.0100889	0.0165702	0.00326973	0.0135062	0.00357154	0.00350607	0.0103204	0.000723479
10	0.00843261	7.72617e-05	0.0167772	0.0159608	0.0195379	0.0199097	0.0481189	0.0266226	0.010816	0.0159688	0.0434732	0.0172468	0.0125486	0.00670176	0.00847271	0.0262474	0.0217888	0.00261207	0.00619795	0.00487165	0.00289099	0.00226251	0.00532606	0.00920789	0.00852413	0.000255228	0.0188143	0.0180708	0.00169674	0.0128352	0.00714354	0.00204507	0.00449326	0.00345296	0.00237283	0.00242393	0.0042233	0.00274928	0.00201846	0.0039008	0.00347409	0.00102021	0.00749374	0.0064465	0.00331616	0.00216145	0.00601927	0.00734341	0.00205407
11	0.00534311	3.47176e-05	0.005734	0.00974405	0.0098112	0.017627	0.0241527	0.00330376	0.00385886	0.0179999	0.0143214	0.0287411	0.0170035	0.00692023	0.00808216	0.0287152	0.00373071	0.000976149	0.00579433	0.00913702	0.00406558	0.000813619	0.00458428	0.0027498	0.0032999	0.00268548	0.00502685	0.00823934	0.00555757	0.00122668	0.00263633	0.00541683	0.00312854	0.00518123	0.00448282	0.00245002	0.0034758	0.00310349	0.00292019	0.000111601	7.82225e-05	0.00162728	0.00810755	0.00520366	0.000166255	0.00611128	0.00417381	0.00669997	0.0079754
12	0	0	0	0	0	0	0	0	0	0	0	0	0	0	0	0	0	0	0	0	0	0	0	0	0	0	0	0	0	0	0	0	0	0	0	0	0	0	0	0	0	0	0	0	0	0	0	0	0
[truncated: 28 more columns]

## Sheet: N=100
			percent area
MESH		group	1	2	3	4	5	6	7	8	9	10	11	12	13	14	15	16	17	18	19	20	21	22	23	24	25	26	27	28	29	30	31	32	33	34	35	36	37	38	39	40	41	42	43	44	45	46	47
1			0.25179	3.67871	0.742698	2.69003	1.72837	4.52129	8.42339	10.6522	23.9304	8.46526	4.33614	9.91792	3.33896	1.53939	1.6499	0.211568	0.353991	2.59172	0.370526	0.250249	1.52637	1.07176	0	0	0.828824	0	0	0.231294	1.14301	0	0.0127906	0.202304	0.21182	0.132239	0.0269975	0.72071	0.469328	0.0187655	0	0	0	0.0819353	0.473231	0.33893	0	0	0
2			5.22083	3.87628	1.63634	4.1186	1.82148	2.82087	7.58392	7.76136	8.47443	6.42596	9.95452	9.10769	6.12241	7.49347	1.57032	0.389085	2.59724	0.549348	1.60367	0.625053	0	1.58808	0.694081	0.284898	0.081237	0	0.0324134	0.478242	0.10436	0	0.831915	1.11138	0.49562	0.514392	0.572785	0	0	0.0639646	0.434778	0	0	0.0525955	0	0.133165	0.182338	0	0
3			3.66412	4.63508	2.88206	1.75802	3.0778	4.61209	6.22217	8.21683	8.38906	9.41429	10.0681	4.48409	4.44097	3.37502	2.63308	6.64355	2.90103	0.550703	0.950417	0.317786	1.6293	0	0.589535	0.41975	0.664449	0.105964	0.523414	0.454358	0.30347	0.337778	0.2569	0	0.520395	0.36127	0.030988	0.0337248	0.0481991	0.42989	0.390788	0	0	0.028825	0	0.417795	0.131981	0.0977887	0
4			3.72851	5.13746	1.27259	2.82661	3.46639	2.72887	7.00297	8.15609	9.57722	11.596	4.55324	7.7532	6.06318	3.15738	2.10774	3.48592	3.3249	1.80123	1.90407	0.601292	0.0898521	0.757238	0.542519	0.360226	0.0948883	0.289449	0.0630189	0.801839	0.107748	0.213597	0.601871	0.132152	0.354849	0.632662	0	0.412434	0.137095	0.0312775	0.0999069	0.443805	0.248422	0.0183336	0	0.234577	0.206741	0.321398	0
5			3.4072	4.1764	3.23232	2.92673	2.55635	3.48694	6.17748	8.50083	10.7158	9.33891	5.43578	7.50914	4.41315	3.96621	4.95108	1.70548	2.86059	2.28455	1.29219	1.01097	0.521844	0.571572	0.199138	0.59889	0.413988	0.328791	0.160097	0.210478	0.327678	0.225908	0.49711	0.215234	1.08695	0.161395	0.126438	0.319058	0	0.353967	0	0	0	0.123992	0.26733	0	0.207233	0	0.163855
6			3.75532	3.8259	3.44512	2.46535	2.81214	3.08766	6.41555	8.19609	10.9099	8.57036	7.18102	6.51405	4.90276	4.6257	3.67724	2.99683	2.56644	1.98702	1.18985	0.745984	0.811263	0.496817	0.386411	0.562471	0.418083	0.349347	0.207574	0.269775	0.289839	0.389219	0.282805	0.141354	0.214422	0.133521	0.232645	0.198314	0.147386	0.197281	0.30256	0.0843143	0.0505489	0.0906506	0.051719	0.104127	0.147107	0.0963466	0.142502
7			3.53251	3.98716	3.27765	2.51017	2.83588	3.54371	6.38783	8.12652	10.8308	8.72033	7.04565	6.6413	5.27238	4.13739	3.38136	2.7545	2.89836	1.87863	1.20879	0.928777	0.613971	0.595825	0.477435	0.53403	0.299151	0.357441	0.313636	0.242309	0.278847	0.29248	0.216574	0.287942	0.319597	0.233236	0.205621	0.189228	0.155211	0.117998	0.18759	0.128828	0.146046	0.109314	0.111344	0.159114	0.117702	0.0610143	0.0785636
8			3.63746	3.98763	3.25486	2.42351	2.72628	3.59969	6.32594	8.12916	10.8497	8.85844	6.79598	6.86142	5.27054	4.11535	3.35477	2.93192	2.66586	2.00334	1.12492	0.89964	0.69084	0.600962	0.448928	0.464826	0.399314	0.33412	0.341881	0.264467	0.286855	0.270242	0.215007	0.260511	0.242671	0.266127	0.228075	0.176192	0.165345	0.182501	0.15199	0.157954	0.139474	0.0695162	0.129081	0.113228	0.104469	0.111797	0.102102
9			3.6097	3.9664	3.22348	2.48724	2.7628	3.62253	6.16201	8.24425	10.7566	8.86001	6.82159	6.77747	5.35929	4.0752	3.37243	2.94633	2.65673	1.98245	1.21237	0.882559	0.683036	0.608432	0.499631	0.429022	0.372346	0.352784	0.329223	0.275469	0.257612	0.29949	0.238492	0.262914	0.237587	0.239878	0.236933	0.181034	0.16632	0.166139	0.18084	0.164762	0.127365	0.116522	0.107896	0.088078	0.124539	0.101706	0.0906209
10			3.55067	4.00345	3.29396	2.49732	2.72902	3.57859	5.99431	8.24903	10.8301	8.85944	6.79979	6.67249	5.41012	4.07889	3.3926	2.89134	2.71281	2.04054	1.21748	0.911096	0.691921	0.579719	0.516041	0.447837	0.392228	0.359172	0.317103	0.288455	0.267816	0.269252	0.242943	0.230698	0.25113	0.273432	0.228233	0.201837	0.17033	0.167949	0.16044	0.157637	0.138221	0.111246	0.113262	0.114074	0.0967516	0.107933	0.0917236
11			3.54606	3.99429	3.3005	2.50421	2.71286	3.59179	5.95531	8.24409	10.8369	8.83561	6.81733	6.66578	5.43054	4.07561	3.38718	2.88495	2.71758	2.04847	1.21543	0.928152	0.686631	0.589855	0.520471	0.443434	0.397142	0.358516	0.309239	0.293556	0.267346	0.271977	0.24441	0.235902	0.240743	0.268184	0.245581	0.194142	0.173916	0.170628	0.155726	0.158227	0.133744	0.12494	0.11555	0.104438	0.10407	0.097777	0.0907282
12			3.54221	3.9915	3.31238	2.50547	2.72067	3.57843	5.93646	8.23374	10.8329	8.84047	6.81057	6.63907	5.44908	4.07349	3.39002	2.88551	2.71766	2.04705	1.24166	0.926469	0.686685	0.589004	0.520212	0.449459	0.401122	0.350834	0.320971	0.287254	0.269828	0.27419	0.240493	0.232464	0.247329	0.267185	0.240279	0.200875	0.175215	0.167363	0.155799	0.161338	0.135034	0.121387	0.113454	0.108618	0.0998232	0.102199	0.0941114
			relative error
mesh	error	variance	1	2	3	4	5	6	7	8	9	10	11	12	13	14	15	16	17	18	19	20	21	22	23	24	25	26	27	28	29	30	31	32	33	34	35	36	37	38	39	40	41	42	43	44	45	46	47
1	0.585131	2.21359	3.29042	0.312792	2.56968	0.184555	0.992302	0.942867	2.48693	2.41847	13.0974	0.375206	2.47443	3.27884	2.11012	2.5341	1.74012	2.67394	2.36367	0.544665	0.871133	0.676219	0.83968	0.482754	0.520212	0.449459	0.427702	0.350834	0.320971	0.0559604	0.873181	0.27419	0.227702	0.0301598	0.0355089	0.134946	0.213281	0.519836	0.294113	0.148597	0.155799	0.161338	0.135034	0.0394522	0.359777	0.230312	0.0998232	0.102199	0.0941114
2	0.421468	0.520775	1.67862	0.115214	1.67604	1.61312	0.899191	0.757558	1.64746	0.472378	2.3585	2.41451	3.14395	2.46862	0.673329	3.41998	1.8197	2.49643	0.120417	1.49771	0.362014	0.301416	0.686685	0.999073	0.173869	0.164562	0.319885	0.350834	0.288558	0.190988	0.165468	0.27419	0.591422	0.878918	0.248291	0.247206	0.332506	0.200875	0.175215	0.103398	0.278978	0.161338	0.135034	0.068792	0.113454	0.0245473	0.0825145	0.102199	0.0941114
3	0.292059	0.371824	0.12191	0.643583	0.43032	0.747451	0.357132	1.03366	0.285715	0.0169013	2.44387	0.573826	3.25753	2.15498	1.0081	0.698472	0.75694	3.75803	0.183373	1.49635	0.291242	0.608683	0.94262	0.589004	0.069323	0.0297091	0.263327	0.24487	0.202443	0.167104	0.0336421	0.0635879	0.0164069	0.232464	0.273066	0.0940849	0.209291	0.16715	0.127016	0.262527	0.234989	0.161338	0.135034	0.0925625	0.113454	0.309177	0.0321582	0.00440989	0.0941114
4	0.271832	0.223592	0.186298	1.14596	2.03979	0.321136	0.745715	0.849555	1.06652	0.0776472	1.25571	2.75556	2.25733	1.11413	0.614106	0.916106	1.28228	0.600409	0.607247	0.245828	0.662407	0.325177	0.596833	0.168234	0.0223067	0.0892335	0.306234	0.0613847	0.257952	0.514585	0.16208	0.0605927	0.361378	0.100312	0.107521	0.365477	0.240279	0.21156	0.0381196	0.136085	0.0558926	0.282466	0.113388	0.103054	0.113454	0.125959	0.106918	0.2192	0.0941114
5	0.159884	0.0740385	0.135014	0.184903	0.0800592	0.421254	0.164318	0.0914843	0.241023	0.267097	0.117107	0.498437	1.3748	0.870067	1.03593	0.107281	1.56106	1.18003	0.142934	0.237496	0.0505294	0.0845016	0.164841	0.0174316	0.321074	0.14943	0.0128665	0.022043	0.160875	0.0767756	0.0578502	0.0482819	0.256617	0.0172298	0.839623	0.10579	0.113841	0.118184	0.175215	0.186604	0.155799	0.161338	0.135034	0.00260415	0.153875	0.108618	0.10741	0.102199	0.0697432
6	0.0771852	0.0122016	0.213114	0.165601	0.132747	0.0401228	0.0914718	0.490772	0.479089	0.0376452	0.0769792	0.270109	0.37045	0.125024	0.546314	0.552213	0.287214	0.111318	0.15122	0.0600346	0.0518134	0.180485	0.124578	0.0921875	0.133801	0.113012	0.0169614	0.00148707	0.113398	0.0174791	0.020011	0.115029	0.0423121	0.0911103	0.0329068	0.133664	0.00763379	0.00256036	0.0278293	0.0299184	0.146761	0.0770239	0.0844853	0.0307369	0.0617354	0.00449076	0.0472843	0.00585193	0.0483907
7	0.0360755	0.00362148	0.00969848	0.00434171	0.0347271	0.00469378	0.115205	0.0347204	0.451369	0.107219	0.00211063	0.120142	0.23508	0.00222385	0.1767	0.063902	0.00865912	0.131008	0.180699	0.168422	0.0328739	0.00230827	0.0727146	0.00682129	0.0427774	0.0845704	0.101971	0.00660723	0.00733473	0.0449452	0.00901872	0.0182904	0.0239188	0.0554773	0.0722677	0.0339491	0.0346578	0.0116464	0.0200037	0.0493648	0.0317908	0.0325106	0.0110116	0.0120739	0.00210992	0.0504964	0.0178788	0.0411843	0.0155478
8	0.0263003	0.00245726	0.0952492	0.00386637	0.0575185	0.0819665	0.00561236	0.0212624	0.389481	0.104576	0.0167612	0.0179758	0.0145969	0.22235	0.178533	0.0418589	0.0352491	0.0464101	0.0517953	0.043715	0.116743	0.0268289	0.00415443	0.0119582	0.0712839	0.0153668	0.0018079	0.016714	0.0209102	0.022787	0.0170266	0.00394809	0.0254856	0.028047	0.00465792	0.00105832	0.0122032	0.0246824	0.00987001	0.0151384	0.00380953	0.00338381	0.0044397	0.0518713	0.0156269	0.00461006	0.00464536	0.00959862	0.00799079
9	0.0190296	0.000933213	0.0674918	0.0251018	0.0888942	0.0182332	0.0421318	0.0441019	0.225549	0.0105088	0.0763716	0.0195444	0.0110172	0.138395	0.0897896	0.00171185	0.0175892	0.0608158	0.0609297	0.0645992	0.0292854	0.0439098	0.00364941	0.0194276	0.0205811	0.0204372	0.0287761	0.0019502	0.00825181	0.0117847	0.0122162	0.0253001	0.00200132	0.0304497	0.00974211	0.0273074	0.0033453	0.0198403	0.00889489	0.00122357	0.0250405	0.00342337	0.00766963	0.0048655	0.00555875	0.0205396	0.0247159	0.000492351	0.00349053
10	0.00697597	6.61611e-05	0.00845785	0.0119501	0.0184204	0.00815123	0.008352	0.000161931	0.0578527	0.0152956	0.00285228	0.0189692	0.0107833	0.0334179	0.038953	0.00540357	0.00257458	0.00583074	0.004851	0.00651011	0.024183	0.0153724	0.00523617	0.00928533	0.00417112	0.00162223	0.0088943	0.00833745	0.00386792	0.00120046	0.0020125	0.00493796	0.00244963	0.00176583	0.0038011	0.00624702	0.0120461	0.000961981	0.00488443	0.000586309	0.0046405	0.00370132	0.00318727	0.0101412	0.000192794	0.0054566	0.00307157	0.00573404	0.00238777
11	0.00456296	2.21826e-05	0.00384575	0.00279651	0.0118735	0.00126764	0.00781191	0.0133643	0.0188511	0.0103535	0.00396585	0.00486093	0.00675979	0.0267121	0.0185345	0.00212002	0.00283622	0.000563459	7.61175e-05	0.00141527	0.0262297	0.00168314	5.40482e-05	0.000851013	0.000258497	0.0060253	0.00398015	0.00768169	0.0117326	0.00630164	0.00248238	0.00221292	0.00391654	0.00343747	0.00658602	0.000998277	0.00530258	0.00673281	0.00129865	0.00326523	7.36597e-05	0.00311153	0.00129045	0.00355215	0.00209539	0.00417977	0.00424641	0.00442156	0.0033832
12	0	0	0	0	0	0	0	0	0	0	0	0	0	0	0	0	0	0	0	0	0	0	0	0	0	0	0	0	0	0	0	0	0	0	0	0	0	0	0	0	0	0	0	0	0	0	0	0	0
[truncated: 53 more columns]
